# Supplementary material for: hapE and hmg1 Mutations Are Drivers of cyp51A-Independent Pan-Triazole Resistance in an Aspergillus fumigatus Clinical Isolate
Source: PubMed Central journal article supplement (PMC10269825; doi:10.1128/spectrum.05188-22), 2023-05-04
Supplement: spectrum.05188-22-s0001.pdf [file spectrum.05188-22-s0001.pdf]

1 SUPPLEMENTAL MATERIAL

2

3 Table S1. crRNA and primers sequences used in this study.

|         | Name          | Sequence                                                                                        | Description                                                             |
|---------|---------------|-------------------------------------------------------------------------------------------------|-------------------------------------------------------------------------|
| crRNAs  | hapE crRNA 5' | GTTCCATGCTCAGATTTTC                                                                             | hapE 5' gRNA complex                                                    |
|         | hapE crRNA 3' | CGTATTTGAAGCCGTTGTG                                                                             | hapE 3' gRNA complex                                                    |
|         | hmg1 crRNA 5' | ATTTTGTCTATGATAGACAA                                                                            | hmg1 5' gRNA complex                                                    |
|         | hmg1 crRNA 3' | CCAAAGATTGCCAAAGGTCA                                                                            | hmg1 3' gRNA complex                                                    |
| Primers | P1            | TTTTGGCGCCGATGGAACAGTCTTCGAGAGC                                                                 | Cloning of <i>hapE</i> in pAGRP                                         |
|         | P2            | GGCCTAATTAATTAGGAAGAGTTTTGGCATACCTGCTGTG                                                        | Cloning of <i>hapE</i> in pAGRP                                         |
|         | P3            | TCITGTAAGTCCGCTTCTGTTGACTTCGTTGTTGCTAGAAAATCTCAGACATGGAACAGTCTTCG                               | Repair template for <i>hapE</i> gene manipulation                       |
|         | P4            | TTCGAAAGGAGCATGGTTAGCTTAATCGCGTACCGACATGCGGAGAATATGGAGCTTCATCGAATC                              | Repair template for <i>hapE</i> gene manipulation                       |
|         | P5            | TGGGAGACCTCTCGCGATAC                                                                            | External screening primer to confirm <i>hapE</i> gene editing           |
|         | P6            | CTTCCAGTATACTCGTTAACCTGCC                                                                       | External screening primer to confirm <i>hapE</i> gene editing           |
|         | P7            | ATGGCCAAGTTGACCAAGTGC                                                                           | Internal screening primer to confirm <i>hapE</i> gene editing           |
|         | P8            | TCAGTCTGCTCTCGGC                                                                                | Internal screening primer to confirm <i>hapE</i> gene editing           |
|         | P9            | AGCCCGCATAGTAGTCTCG                                                                             | Sequencing primer for <i>hapE</i>                                       |
|         | P10           | CCAAATGCCACTGGCCCG                                                                              | Sequencing primer for <i>hapE</i>                                       |
|         | P11           | GACAGGCGGCTTACACCGCCTCTCTGCTCGCCATTTGTCTATGATCACTGATGGCTACCTCTCGATT                             | Repair template for <i>hmg1</i> gene manipulation ( <i>hmg1</i> allele) |
|         | P12           | TCTGGACCGATGGCTGTGTAGAAGTACTCGCGATAGTGGAACCGACGCCACGCACTCGTGGAGGGCAAAGGAATAGGCTGCGTTACTCGGCTTGG | Repair template for <i>hmg1</i> gene manipulation ( <i>hmg1</i> allele) |
|         | P13           | CCACTATCGGCGAGTACTCTACAC                                                                        | Repair template for <i>hmg1</i> gene manipulation (HygR)                |
|         | P14           | CCCACCTGGGATGAAGCAAAGCGGGTACATAGATAGGTTTATGGGGACTTTGGGAAGTAAATATGGCGAGCTCCAAATCTGTCCAG          | Repair template for <i>hmg1</i> gene manipulation (HygR)                |
|         | P15           | GCCATAGTGTCTCACCCCTG                                                                            | External screening primer to confirm <i>hmg1</i> gene editing           |
|         | P16           | CGTTGATGCCACCGAAC                                                                               | External screening primer to confirm <i>hmg1</i> gene editing           |
|         | P17           | CGAGCTCCAAATCTGTCC                                                                              | Internal screening primer to confirm <i>hmg1</i> gene editing           |
|         | P18           | GAGTGCTGCTCGGGATTG                                                                              | Internal screening primer to confirm <i>hmg1</i> gene editing           |
|         | P19           | ATATGGCAGCATAACGTAAGGC                                                                          | Sequencing primer for <i>hmg1</i>                                       |
|         | P20           | ATCTGCGAACACTGCTGGAG                                                                            | Sequencing primer for <i>hmg1</i>                                       |
|         | P21           | GGTCTGTTCTCCATGGTC                                                                              | Sequencing primer for <i>hmg1</i>                                       |
|         | P22           | CCCTAAGATCGACTTGAACCCC                                                                          | Sequencing primer for <i>hmg1</i>                                       |
|         | P23           | CGGTGATCAGTTCAGTCTATGTTCC                                                                       | <i>tubA</i> qPCR                                                        |
|         | P24           | CTCTGCGGTACTCTCTCTAC                                                                            | <i>tubA</i> qPCR                                                        |
|         | P25           | CGTGAGAGAAAAGTATGGCGATATCTTC                                                                    | <i>cyp51A</i> qPCR                                                      |
|         | P26           | GTCGTCAATGGACTATAGACCTCTCCG                                                                     | <i>cyp51A</i> qPCR                                                      |

4

5

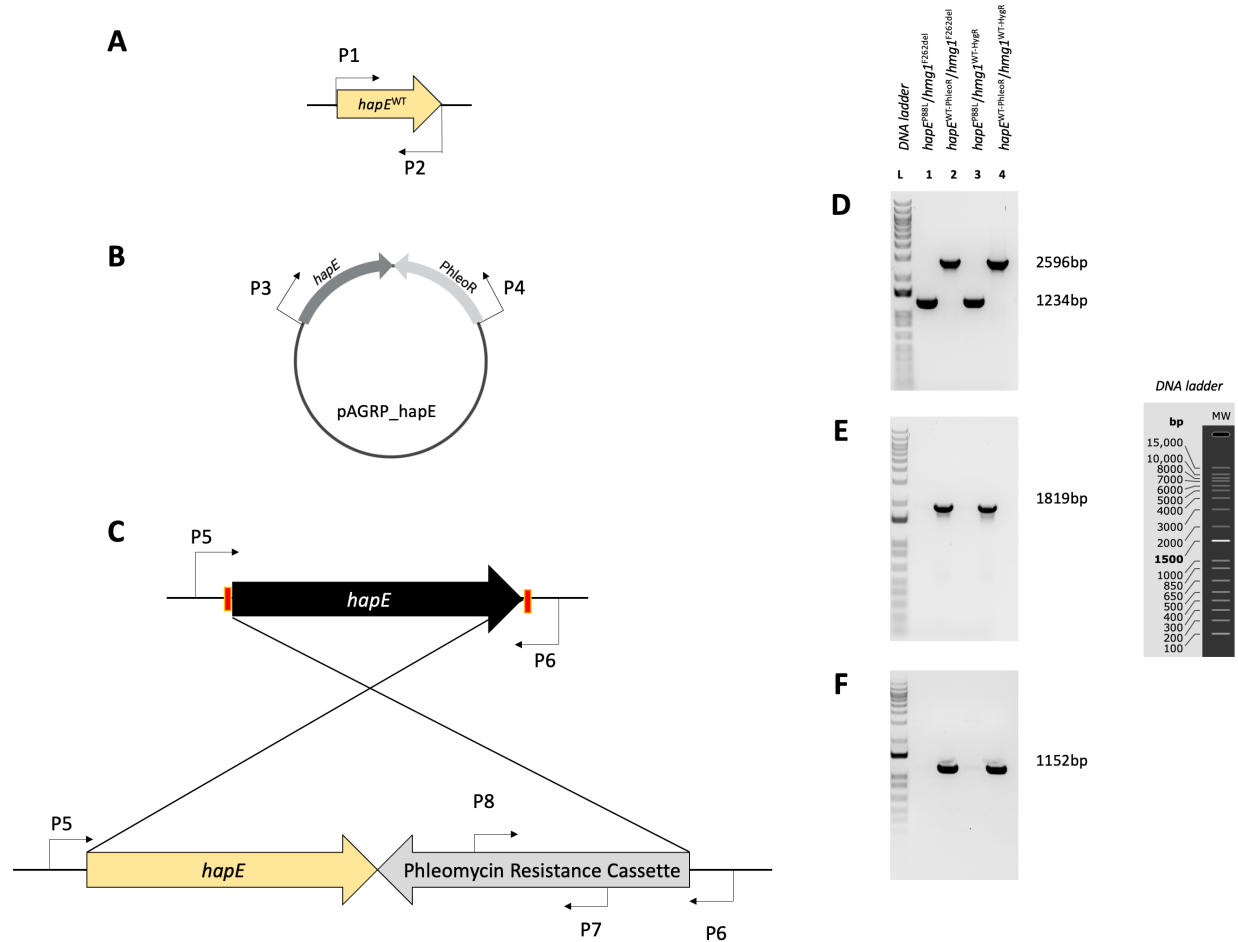

6  
7

8 **Figure S1.** *hapE* gene manipulation strategy. *hapE* gene sequence was amplified from AF293  
 9 (*hapE*<sup>WT</sup>) genomic DNA using primers P1 and P2 (A) and cloned into the pAGRP plasmid  
 10 containing a phleomycin resistance cassette (PhleoR) using the NotI and PacI restriction sites. A  
 11 repair template containing the *hapE* gene sequence flanked by PhleoR was amplified from  
 12 pAGRP\_hapE plasmid using primers P3 and P4 (B). Successful transformation was confirmed by  
 13 PCR using external and internal primers (C). Screening PCR using external primers (P5 and P6)  
 14 were used to confirm successful integration of *hapE*/PhleoR cassette in the *hapE* native locus (non-  
 15 mutants: 1234 bp; *hapE*/PhleoR<sup>+</sup> mutants: 2596 bp) (D). Screening PCR using external and  
 16 internal primers were used to confirm correct orientation of *hapE*/PhleoR cassette: amplification  
 17 with P5 and P7, and P6 and P8 generated a 1819 bp (E) and a 1152 bp (F) amplicon, respectively,  
 18 while no bands were detected in non-transformants. Red boxes represent PAM sites in *hapE* native  
 19 locus.

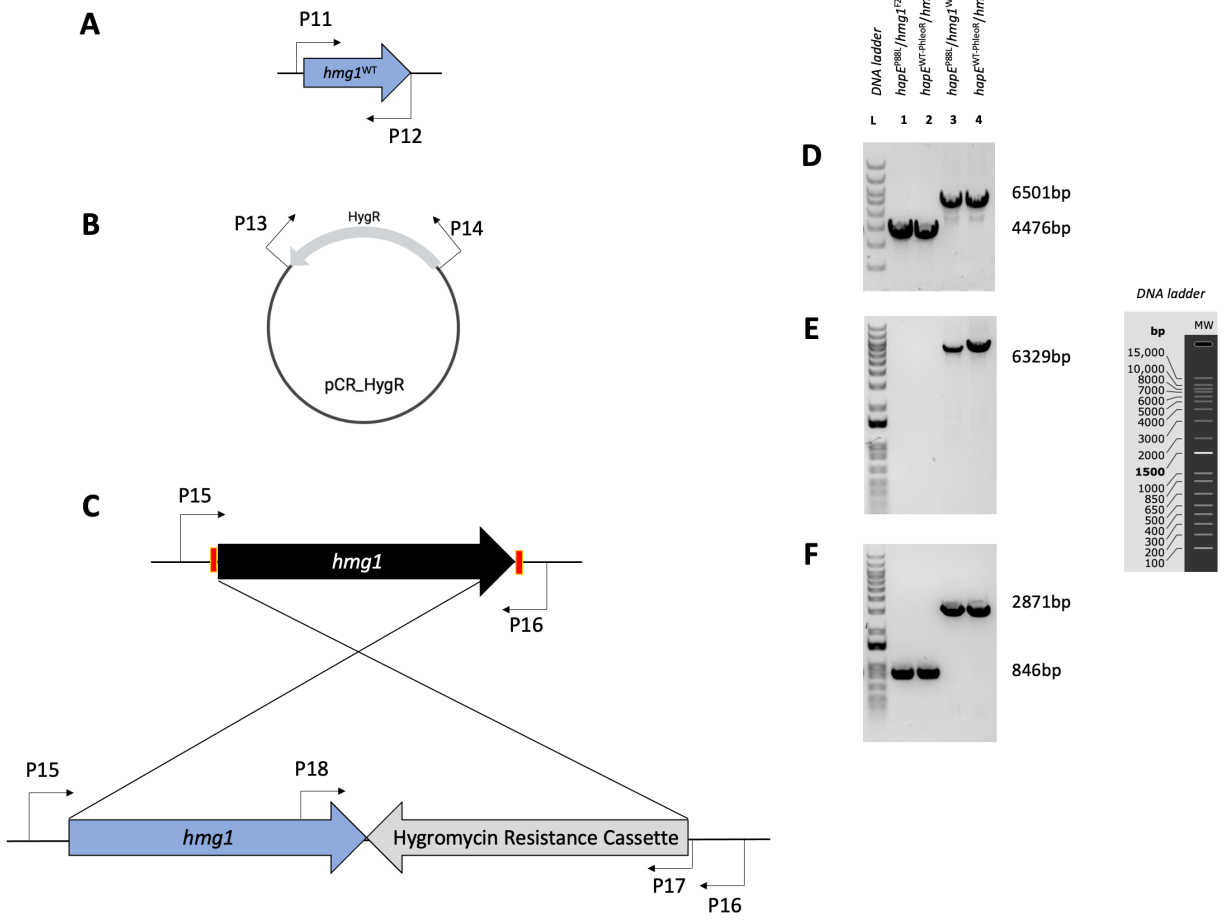

20

21

22 **Figure S2.** *hmg1* gene manipulation strategy. *hmg1* gene manipulation was performed in a  
 23 previous study [25] using a two-component repair template that consisted of a split *hmg1* allele  
 24 and a hygromycin resistance marker (HygR). The *hmg1* allele was generated by PCR from AF293  
 25 (*hmg1*<sup>WT</sup>) genomic DNA using primers P11 and P12 (A). Primer P12 incorporated 80 bases with  
 26 homology to the 3' end of the hygromycin B resistance gene ORF. Meanwhile, the hygromycin  
 27 resistance cassette (HygR) was amplified from the pCR-HygR plasmid using primers P13 and  
 28 P14 (B). P14 introduced approximately 70 bases of homology with the downstream region of  
 29 *hmg1*. Both amplicons were used as a repair template in the transformations. Successful  
 30 transformation was confirmed by PCR (C). Screening PCR using external primers (P15 and P16)  
 31 were used to confirm successful integration of *hmg1*/HygR cassette in the *hmg1* native locus (non-  
 32 mutants: 4476 bp; hapE/PhleoR<sup>+</sup> mutants: 6501 bp) (D). Screening PCR using external and

33 internal primers were used to confirm correct orientation of *hmgI*/HygR cassette: amplification  
34 with P15 and P17 generated a 6329 bp (E) while no bands were detected in non-transformants;  
35 amplification with P16 and P18 generated a 846bp or 2871 bp (F) amplicon for non-transformants  
36 and *hmgI*/HygR<sup>+</sup> transformants, respectively. Red boxes represent PAM sites in *hmgI* native  
37 locus.  
38

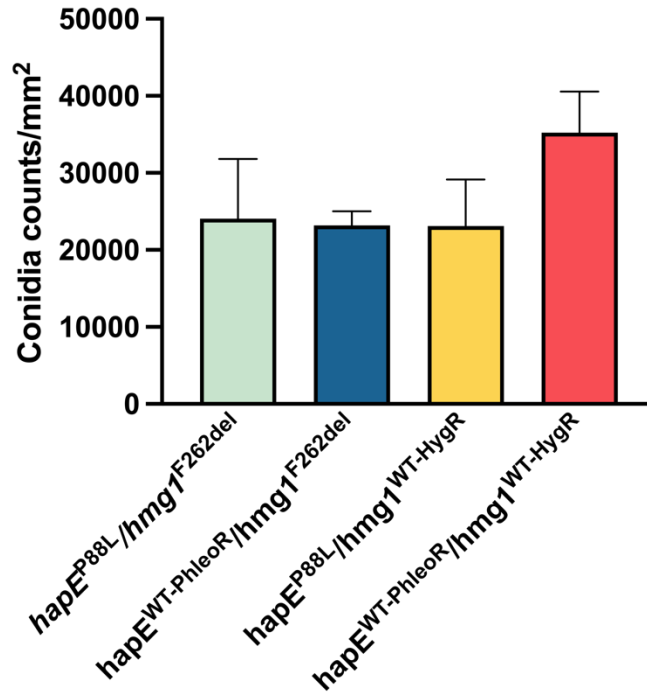

39  
40  
41  
42  
43  
44  
45  
46

**Figure S3.** Conidia production of DI15-105 after correction of *hapE*<sup>P88L</sup> and *hmg1*<sup>F262del</sup> mutations was assessed by point inoculation of 10<sup>4</sup>/5μl *A. fumigatus* conidia in GMM agar and incubation for 96h at 37°C. Experiment was performed using three biological replicates. Statistical analysis was performed using One-way ANOVA with Tukey’s multiple comparisons test.

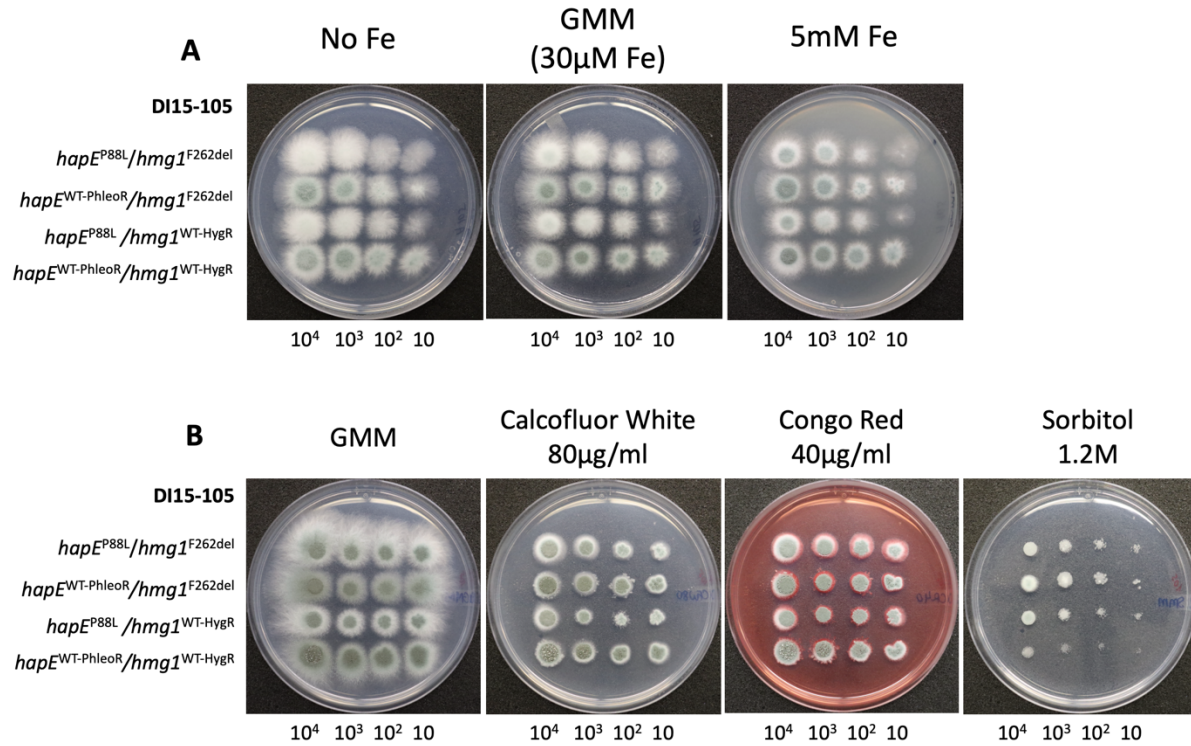

47

48

49 **Figure S4.** Iron, cell wall and osmotic stress phenotypes of DI15-105 after correction of *hapE<sup>P88L</sup>*  
 50 and *hmg1<sup>F262del</sup>* mutations. Fungal growth under stress conditions was analyzed through spot  
 51 dilution assay in GMM agar supplemented as indicated using 5μl suspensions containing 10<sup>4</sup>, 10<sup>3</sup>,  
 52 10<sup>2</sup> and 10 conidia/5μl followed by incubation at 37°C for 48h (A) or 72h (B). Experiments were  
 53 performed using three biological replicates.

54

55

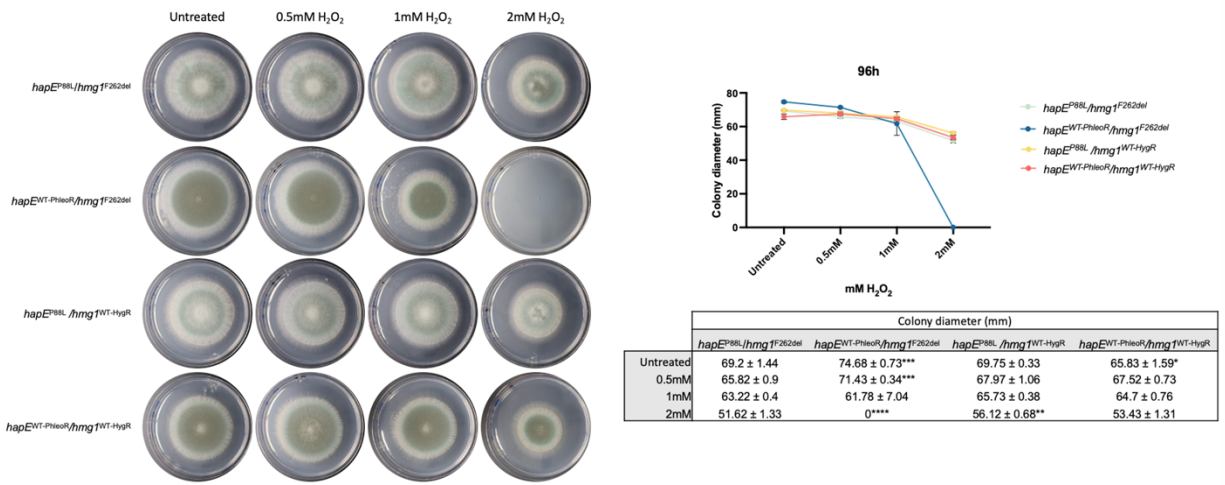

56

57

58 **Figure S5.** Radial growth of DI15-105 after correction of *hapE*<sup>P88L</sup> and *hmgI*<sup>F262del</sup> mutations in  
59 the presence of H<sub>2</sub>O<sub>2</sub>. Fungal growth was analyzed through colony diameter measurements after  
60 10<sup>4</sup> conidia/5μl were spot inoculated in GMM agar supplemented with 0.5, 1 or 2mM of H<sub>2</sub>O<sub>2</sub>  
61 followed by incubation at 35°C for 96h. Experiments were performed independently twice using  
62 three biological replicates. Statistical analysis was performed using One-way ANOVA with  
63 Tukey's multiple comparisons test, where \*p<0.05, \*\*p<0.01, \*\*\*p<0.001 and \*\*\*\* p<0.0001 in  
64 comparison to DI15-105 (*hapE*<sup>P88L</sup>/*hmgI*<sup>F262del</sup>).
